# Supplementary material
Source: bioRxiv or medRxiv preprint supplement (https://www.biorxiv.org/highwire/filestream/120416/field_highwire_adjunct_files/3/397992-4.pdf)
Supplement: Supplementary file [file 397992-4.pdf]

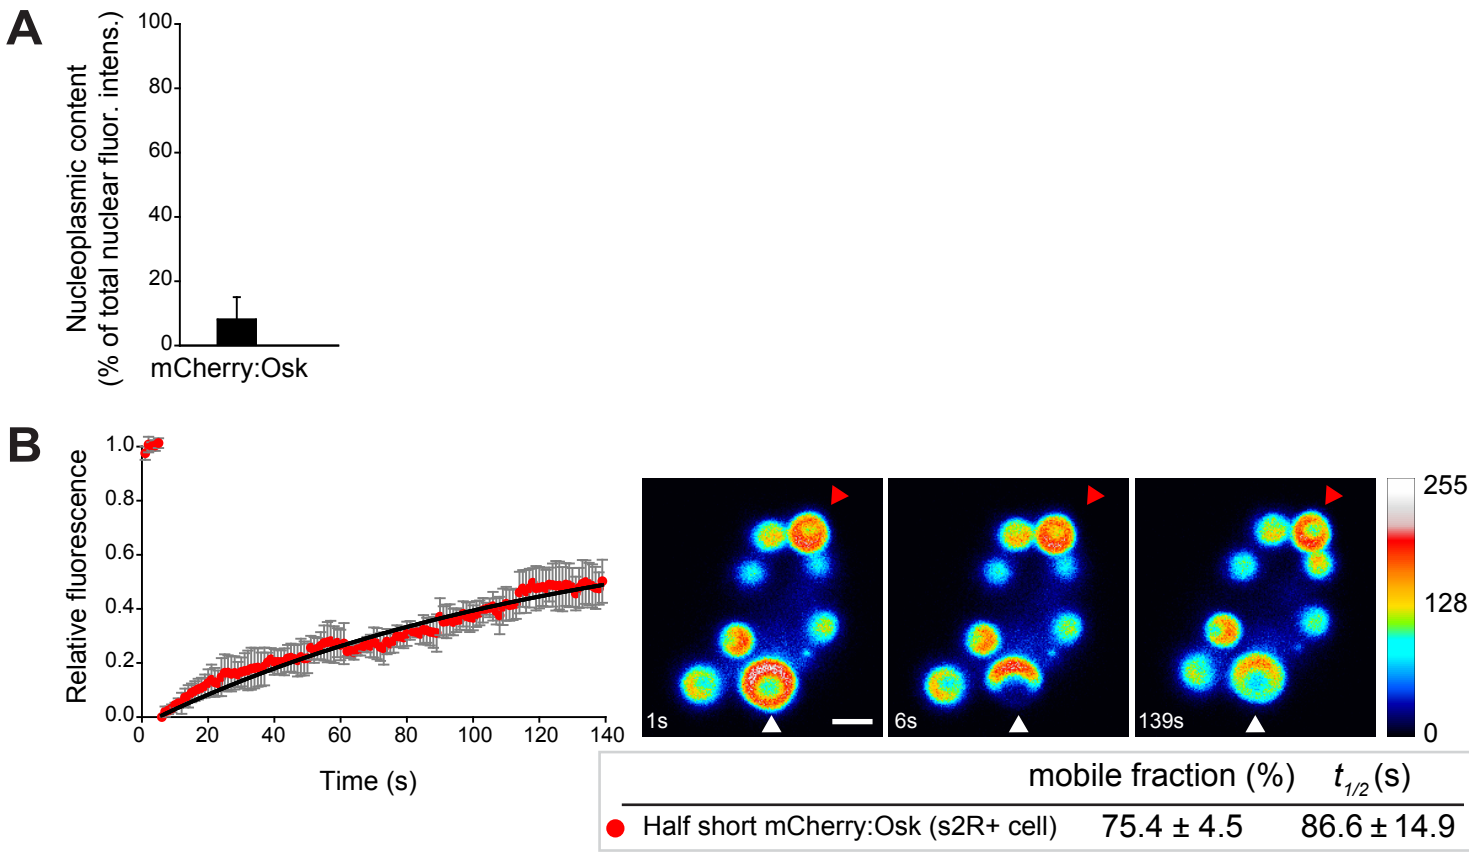

**C**

| Protein | Granule                | Organism                     | Mobile fract. (%)      | $t_{1/2}$ (s) | Reference                                                 |
|---------|------------------------|------------------------------|------------------------|---------------|-----------------------------------------------------------|
| PGL-1   | P granule              | <i>C.elegans</i>             | 68.8                   | 6.9           | Brangwynne, C.P., et al., (2009). Science 324, 1729-1732. |
| GLH-1   |                        |                              | 100.0                  | 26.6          |                                                           |
| PIE-1   |                        |                              | 51.0                   | 7.8           |                                                           |
| CAR-1   |                        |                              | 16.0                   | 3.8           |                                                           |
| TIA-1   | Stress granule         | COS cells                    | 99.0                   | 5.0           | Anderson, P. (2000). J Cell Biol 151, 1257-1268.          |
| PABP-1  |                        |                              | 61.0                   | 5.0           |                                                           |
| LSm6    | P body                 | HeLa cells                   | 73.0                   | 25.0          | Andrei, M.A., et al., (2005). RNA 11, 717-727.            |
| eIF4E   |                        |                              | 89.0                   | 60.0          |                                                           |
| eIF4E-T |                        |                              | 45.0                   | 46.0          |                                                           |
| Dcp1a   | P body                 | U2OS cells                   | 86.0                   | 6.0           | Aizer, A., et al., (2008). Mol Biol Cell 19, 4154-4166.   |
| Dcp1b   |                        |                              | 67.0                   | 11.0          |                                                           |
| Dcp2    |                        |                              | 0                      | /             |                                                           |
| Xvelo   | Balbiani body          | <i>Xenopus</i> oocyte        | ~ 20 % recovery in 1 h |               | Boke, E. et al., (2016). Cell 166, 637-650                |
| Buck    |                        |                              | ~ 20 % recovery in 1 h |               |                                                           |
| PGL-1   | P granule              | <i>C.elegans</i>             | 86.3                   | 4.3           | This study                                                |
| Osk     | Cytoplasmic germ gran. | <i>Drosophila</i> embryo     | 43.6                   | 6.9           |                                                           |
| Vasa    | Nuclear germ gran.     | <i>Drosophila</i> embryo     | 46.0                   | 23.9          |                                                           |
| Osk     | Nuclear germ gran.     | <i>Drosophila</i> embryo     | 38.8                   | 13.9          |                                                           |
| Vasa    | Nuclear germ gran.     | <i>Drosophila</i> S2R+ cells | 51.1                   | 8.7           |                                                           |
| Osk     | Nuclear germ gran.     | <i>Drosophila</i> S2R+ cells | 46.8                   | 10.2          |                                                           |

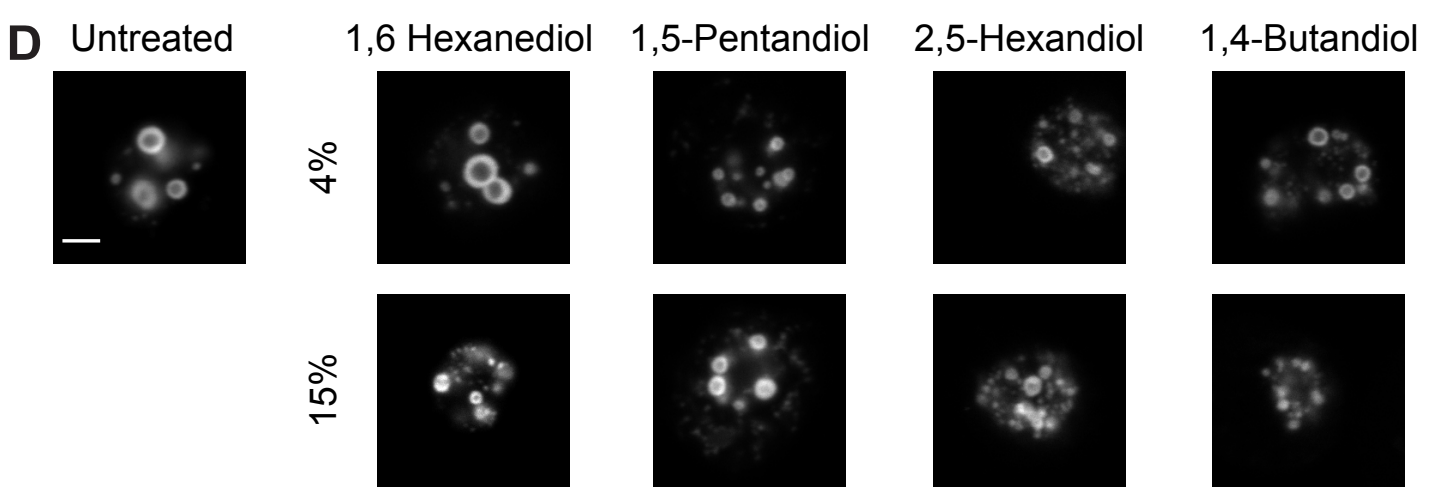

**Figure S4**
